# Supplementary material for: Structural, optical and special spectral changes of Dy3+ emissions in orthovanadates
Source: Royal Society of Chemistry journal article supplement (doi:10.1039/c5ra18982a), 2015-01-01
Supplement: c5ra18982a1.pdf [file c5ra18982a1.pdf]

## Structural, Optical and Special Spectral changes of Dy<sup>3+</sup> Emissions in Orthovanadates

Puja Kumari<sup>a</sup> and J. Manam<sup>a</sup>

*Department of Applied Physics, Indian School of Mines, Dhanbad 826004 India*

*\*Corresponding author E- mail address – [jairam.manam@gmail.com](mailto:jairam.manam@gmail.com),*

*[pp.phy.ism@gmail.com](mailto:pp.phy.ism@gmail.com) Phone No. - +91-9471192138 Fax- +91-326- 2296563*

### LIST OF SUPPLEMENTARY DATA

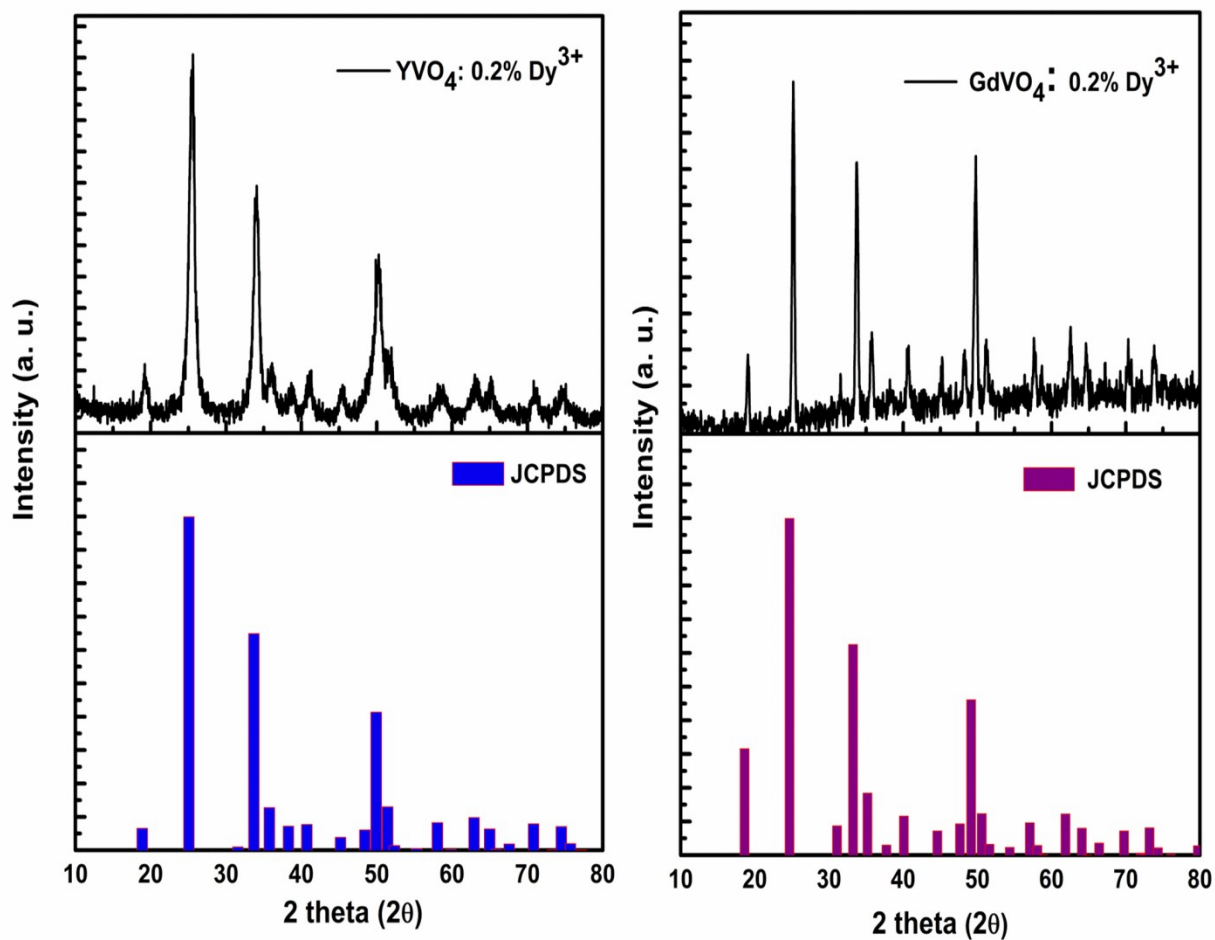

**S1:** XRD pattern of 0.2% Dy<sup>3+</sup> doped YVO<sub>4</sub> and GdVO<sub>4</sub> along with JCPDS pattern.

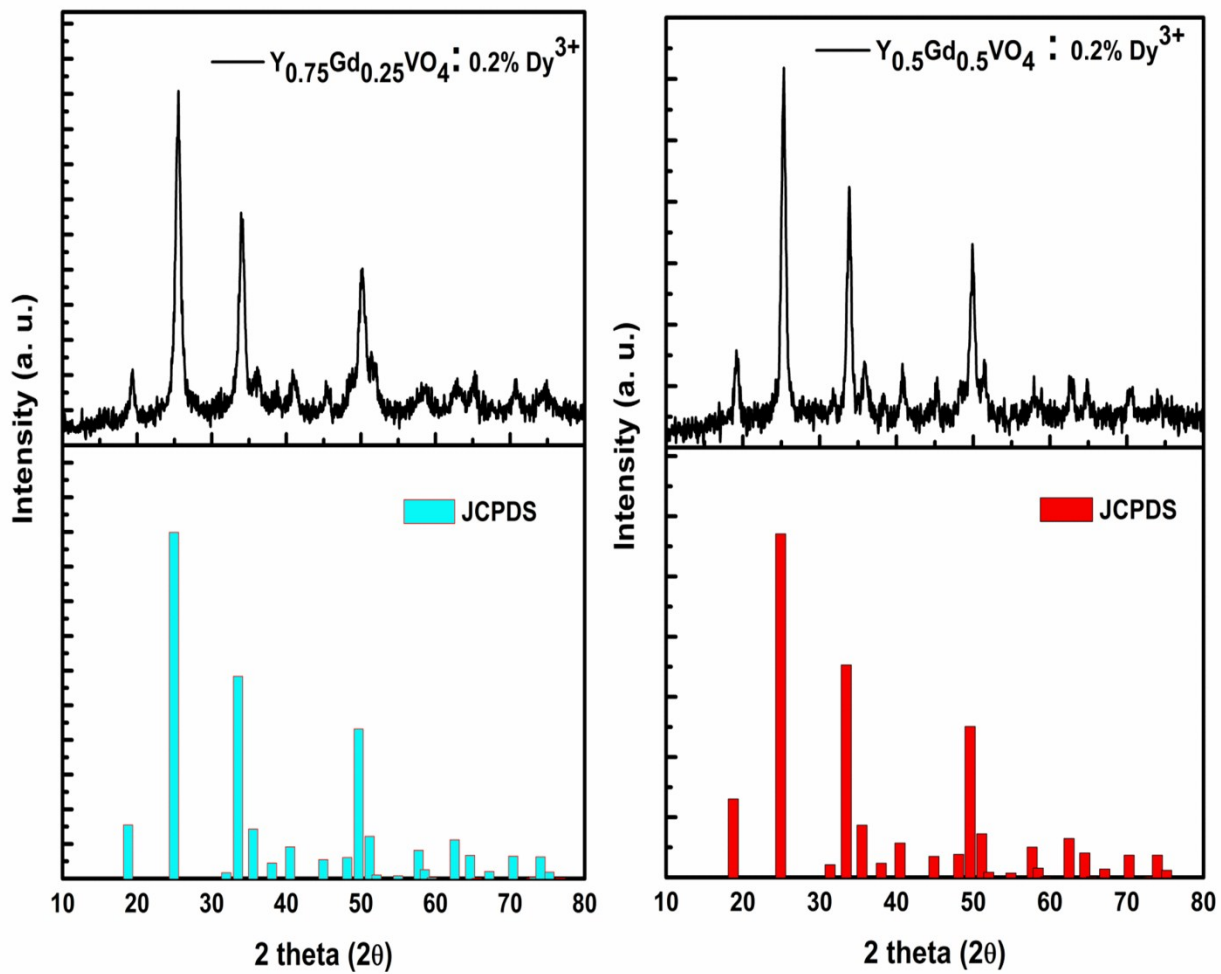

**S2:** XRD pattern of 0.2%  $\text{Dy}^{3+}$  doped  $\text{Y}_{0.75}\text{Gd}_{0.25}\text{VO}_4$  and  $\text{Y}_{0.5}\text{Gd}_{0.5}\text{VO}_4$  along with JCPDS pattern.

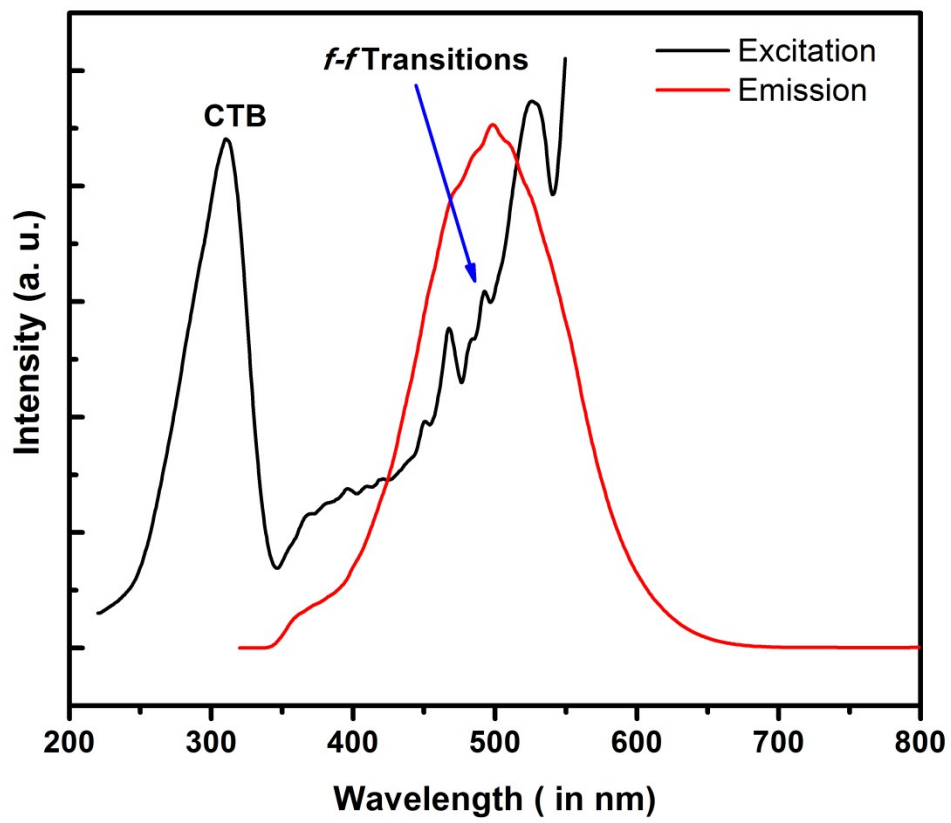

S3: Excitation spectra of  $\text{YVO}_4:0.2\% \text{Dy}^{3+}$  and emission spectra of  $\text{YVO}_4$ .

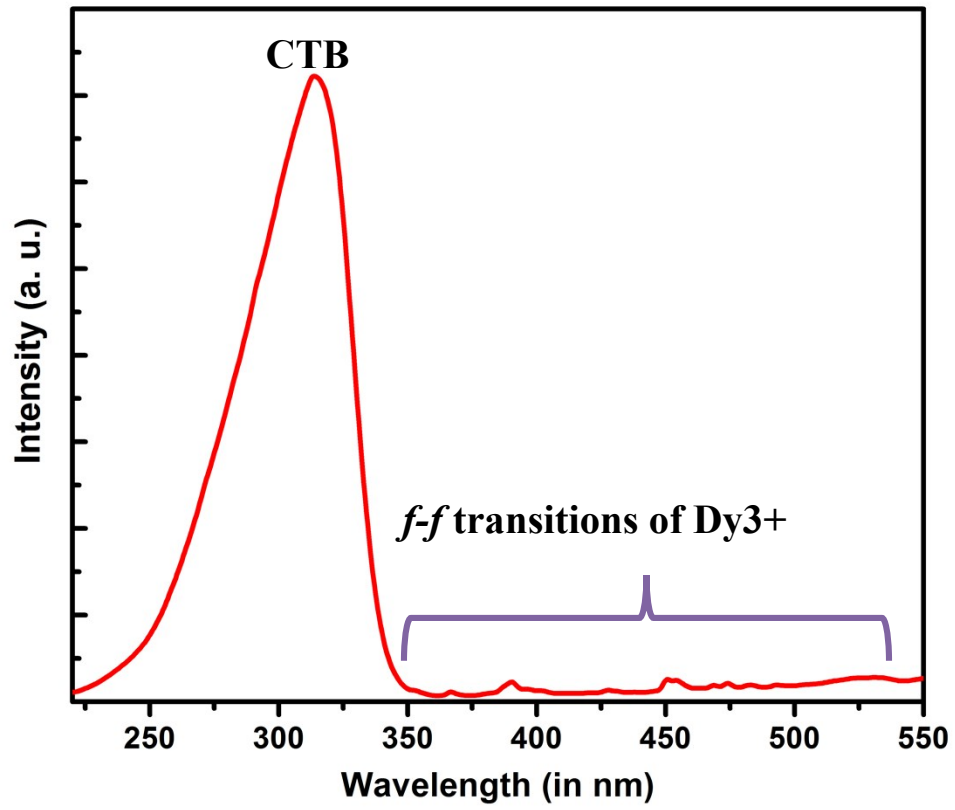

S4: Excitation spectra of  $\text{Y}_{0.25}\text{Gd}_{0.75}\text{VO}_4: 0.2\% \text{Dy}^{3+}$ .

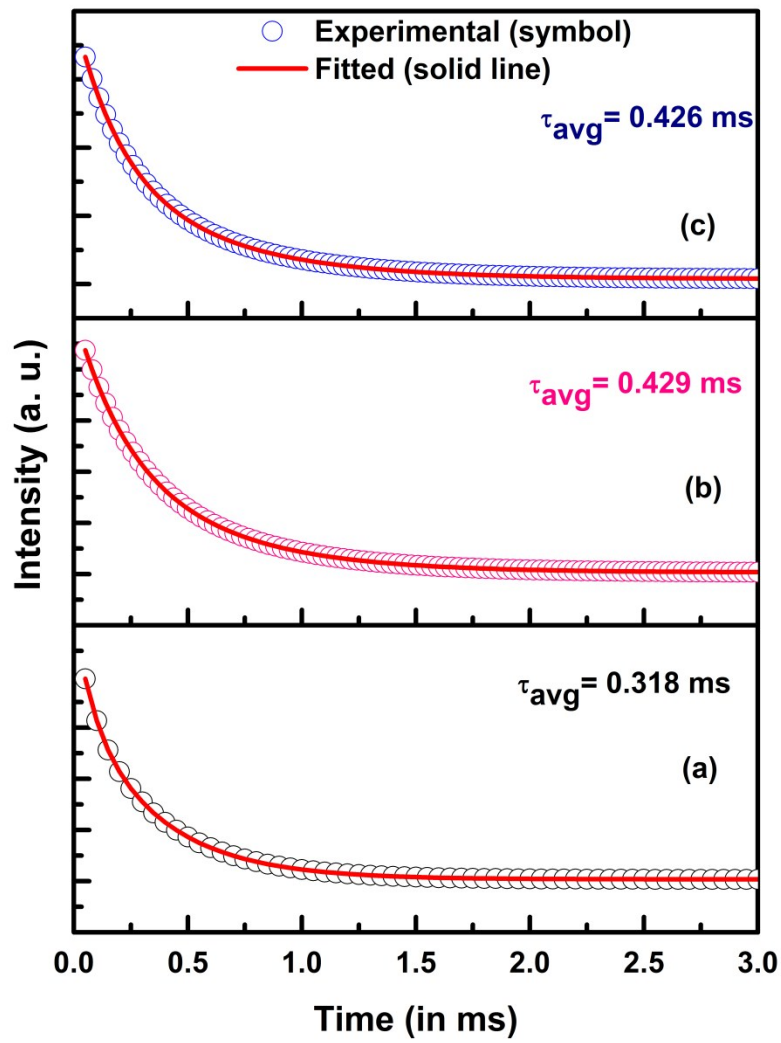

**S5:** Luminescence decay curve of 0.2% Dy<sup>3+</sup> doped (a) YVO<sub>4</sub> (b) Y<sub>0.25</sub>Gd<sub>0.75</sub>VO<sub>4</sub> & (c) GdVO<sub>4</sub>.

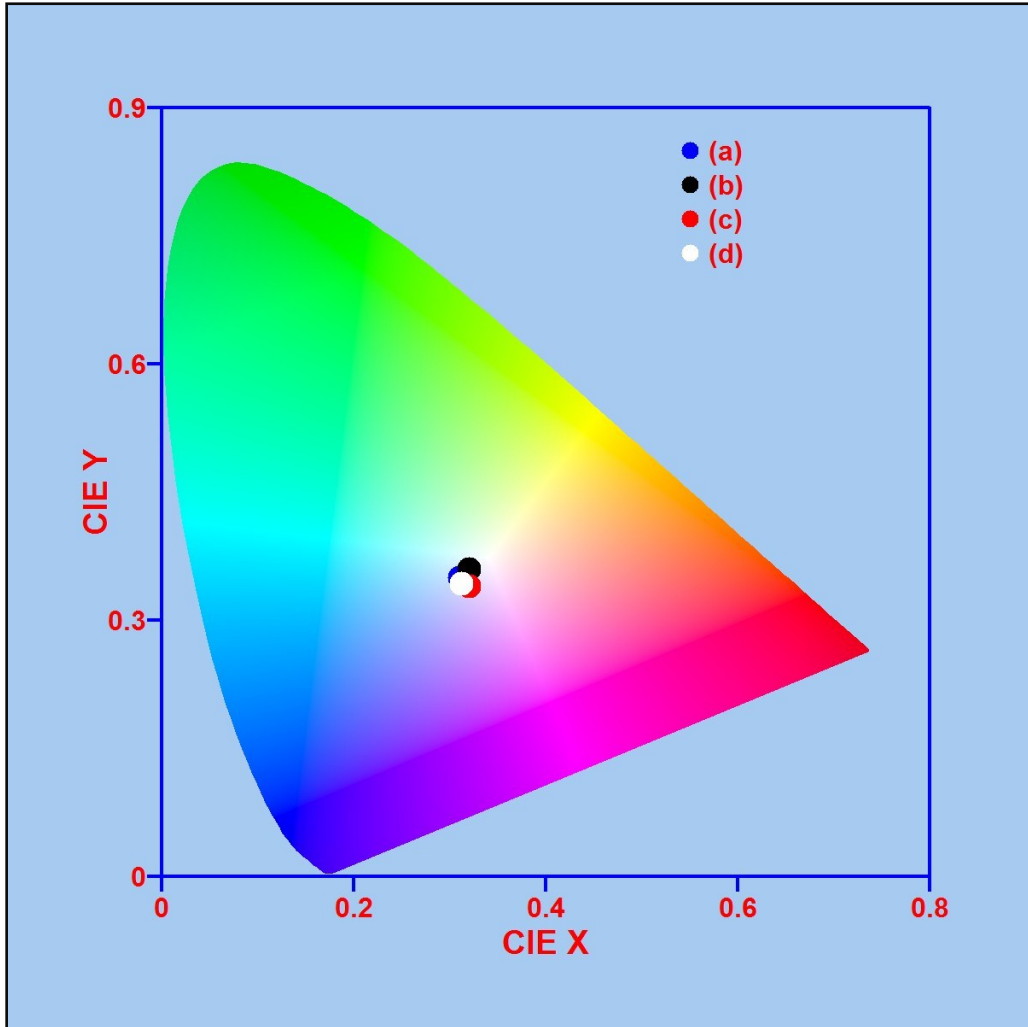

**S6:** CIE diagram of 0.2% Dy<sup>3+</sup> doped Y<sub>0.25</sub>Gd<sub>0.75</sub>VO<sub>4</sub> annealed at (a) 500 °C (b) 600 °C (c) 700 °C (d) 800 °C.

**S7:** CIE co-ordinates and CCT values.

| $\text{Y}_{0.25}\text{Gd}_{0.75}\text{VO}_4 : 0.2\%$ |               |              |            |
|------------------------------------------------------|---------------|--------------|------------|
| $\text{Dy}^{3+}$ annealed at                         | x -Coordinate | y-coordinate | CCT (in K) |
| 500 °C                                               | 0.31          | 0.35         | 6493       |
| 600 °C                                               | 0.32          | 0.36         | 6007       |
| 700 °C                                               | 0.32          | 0.34         | 6072       |
| 800 °C                                               | 0.31          | 0.34         | 6563       |
